# Supplementary material for: Vitrimer ionogels towards sustainable solid-state electrolytes
Source: Royal Society of Chemistry journal article supplement (doi:10.1039/d2ra06829j), 2023-01-01
Supplement: d2ra06829j1.pdf [file d2ra06829j1.pdf]

## Supporting information

# Vitrimer ionogels towards sustainable solid-state electrolytes

*Fengdi Li, Giao T. M. Nguyen, Cédric Vancaeyzeele, Frédéric Vidal, Cédric Plesse\**

Laboratory of Physicochemistry of Polymers and Interfaces, CY Cergy Paris University, 5 Mail Gay  
Lussac, 95000 Neuville sur Oise, France

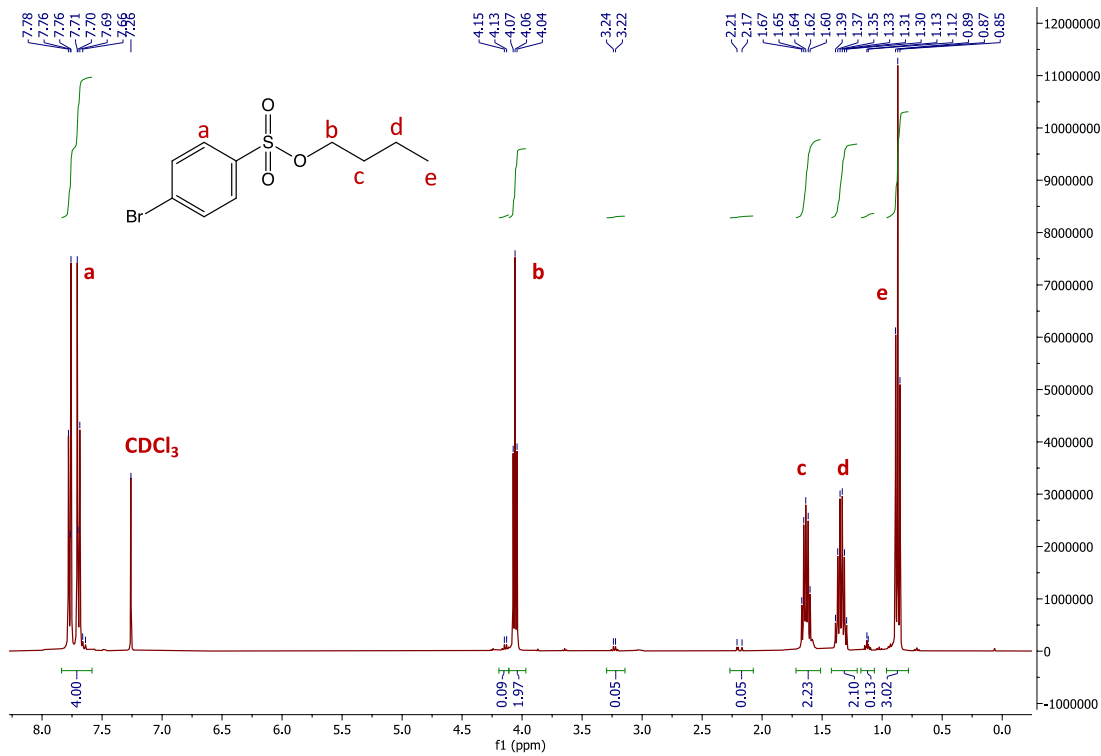

Figure S1. <sup>1</sup>H NMR of alkylation agent butyl-4-bromobenzenesulfonate (BuOBrs) in CDCl<sub>3</sub>.

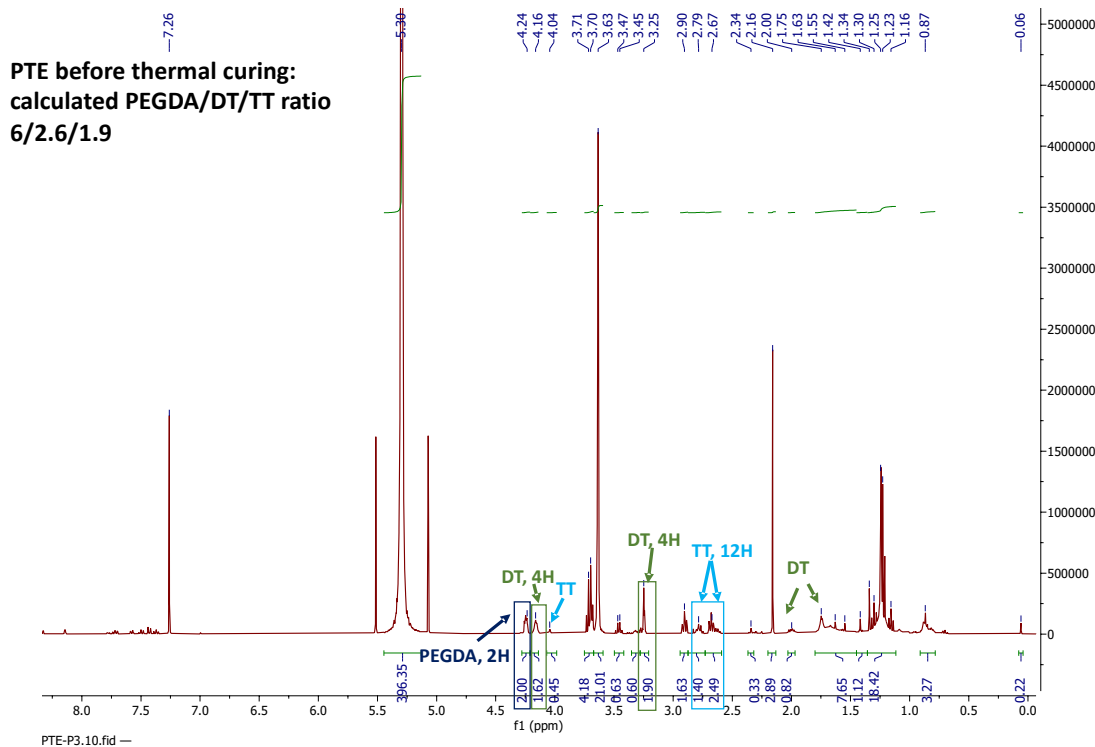

Figure S2. <sup>1</sup>H NMR of the extractable content of PTE sample before thermal curing in CDCl<sub>3</sub>.

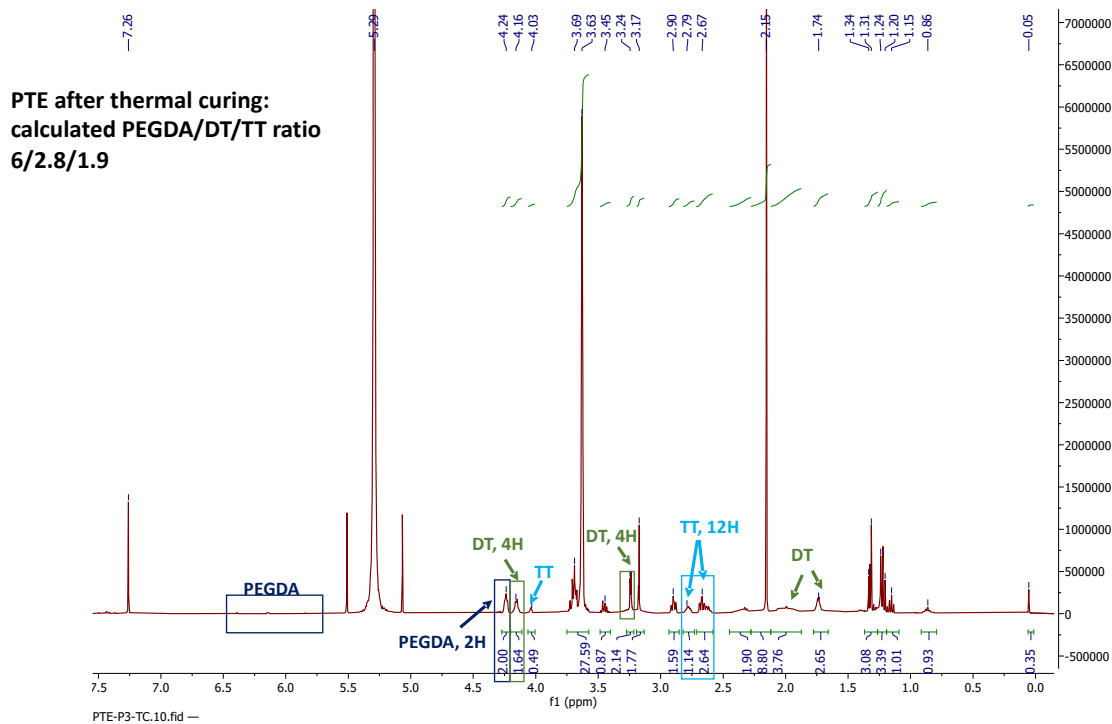

**Figure S3.**  $^1\text{H}$  NMR of the extractable content of PTE sample after thermal curing in  $\text{CDCl}_3$ .

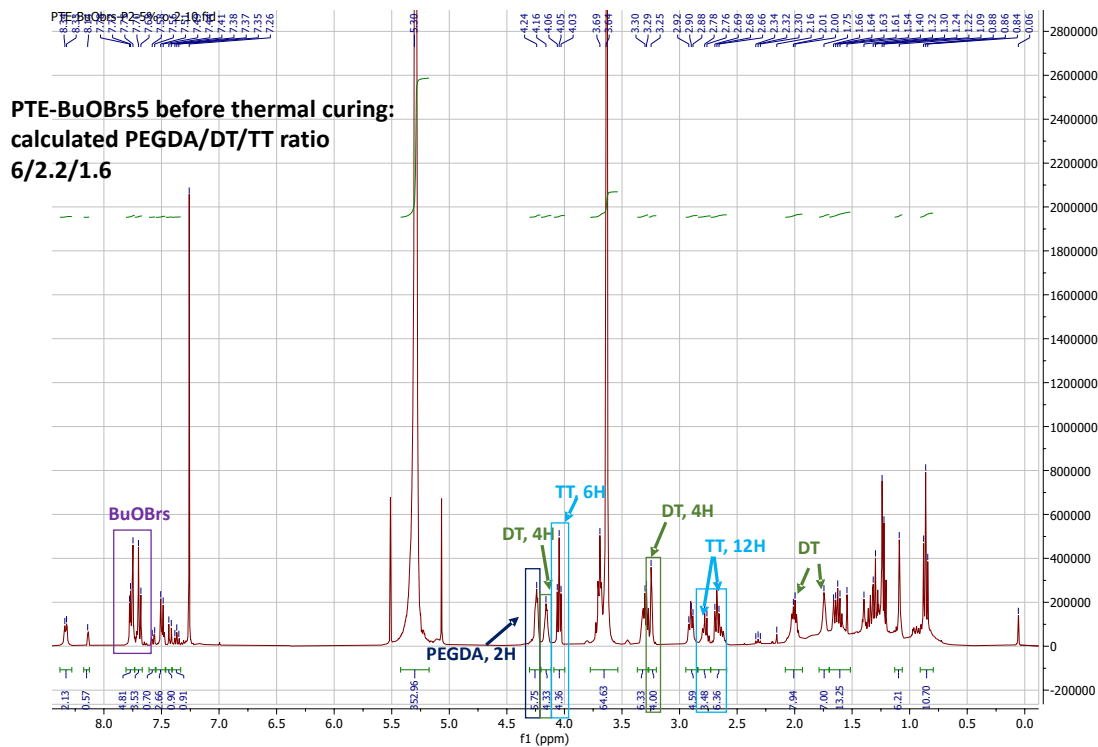

**Figure S4.**  $^1\text{H}$  NMR of the extractable content of PTE-BuOBrs5 sample before thermal curing in  $\text{CDCl}_3$ .

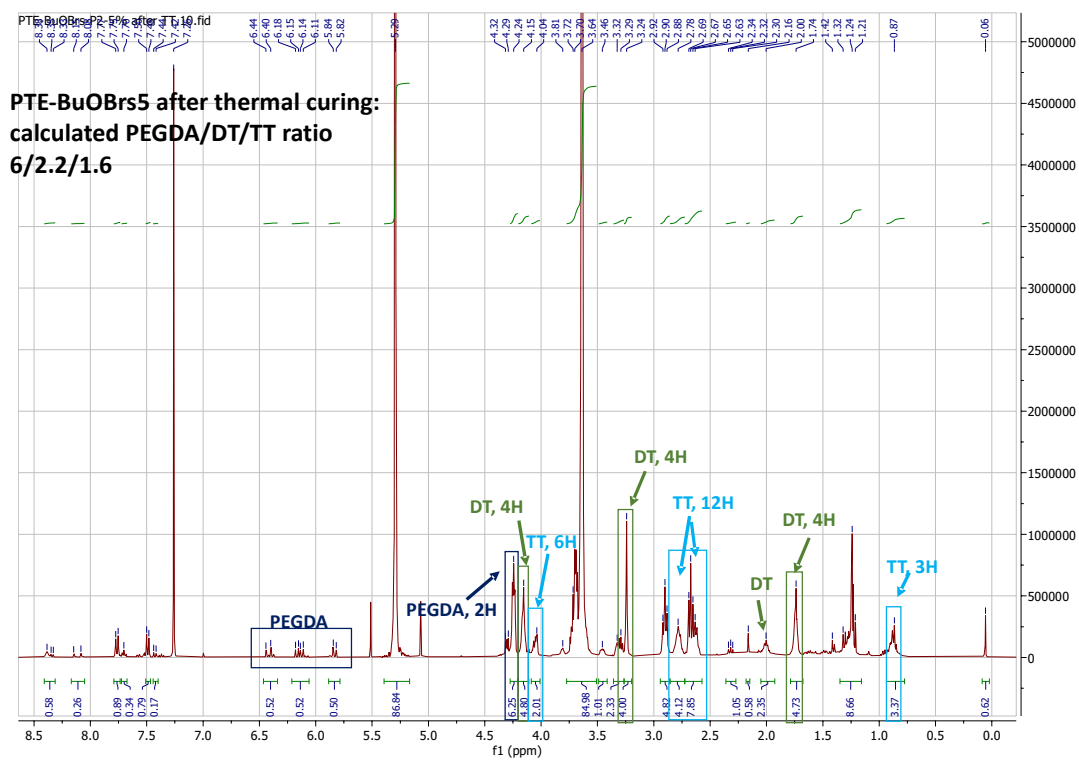

Figure S5.  $^1\text{H}$  NMR of the extractable content of PTE-BuOBrs5 sample after thermal curing in  $\text{CDCl}_3$ .

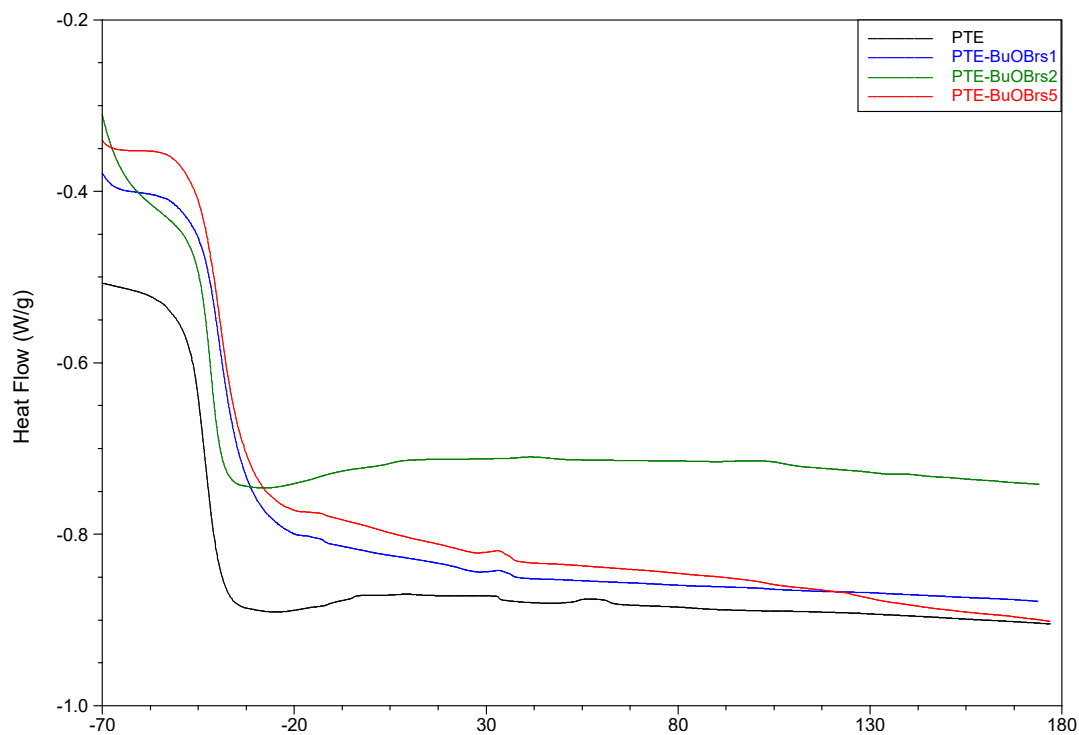

Figure S6. DSC curves of thermal cured PTE-BuOBrs and PTE samples.

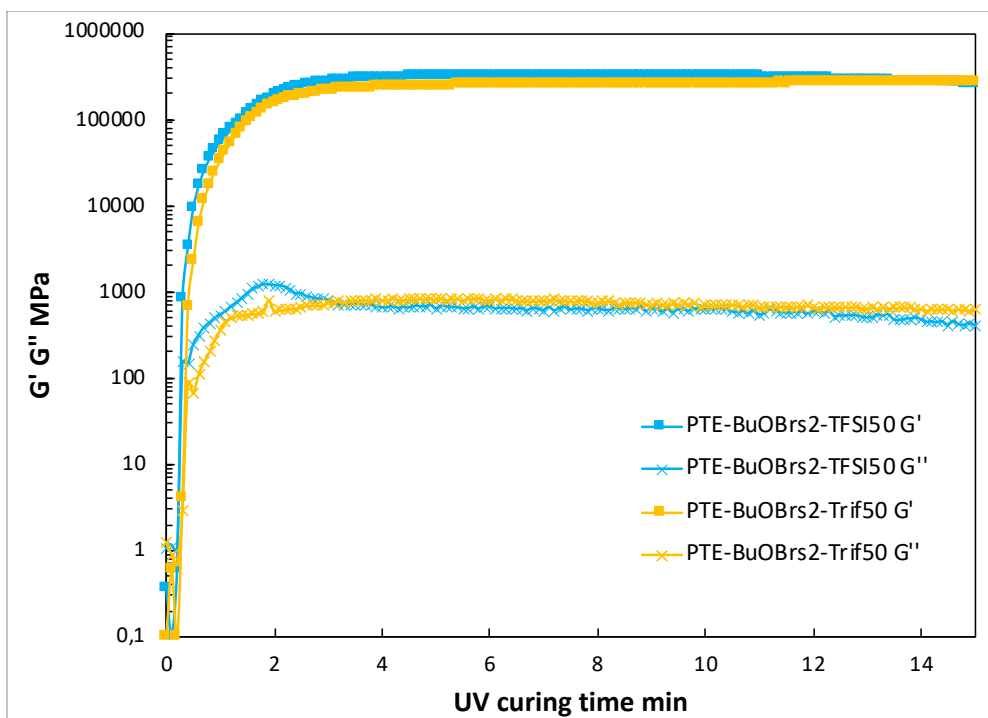

**Figure S7.** Rheological properties of PTE-BuOBrs-IL precursor mixtures as a function of time during photopolymerization

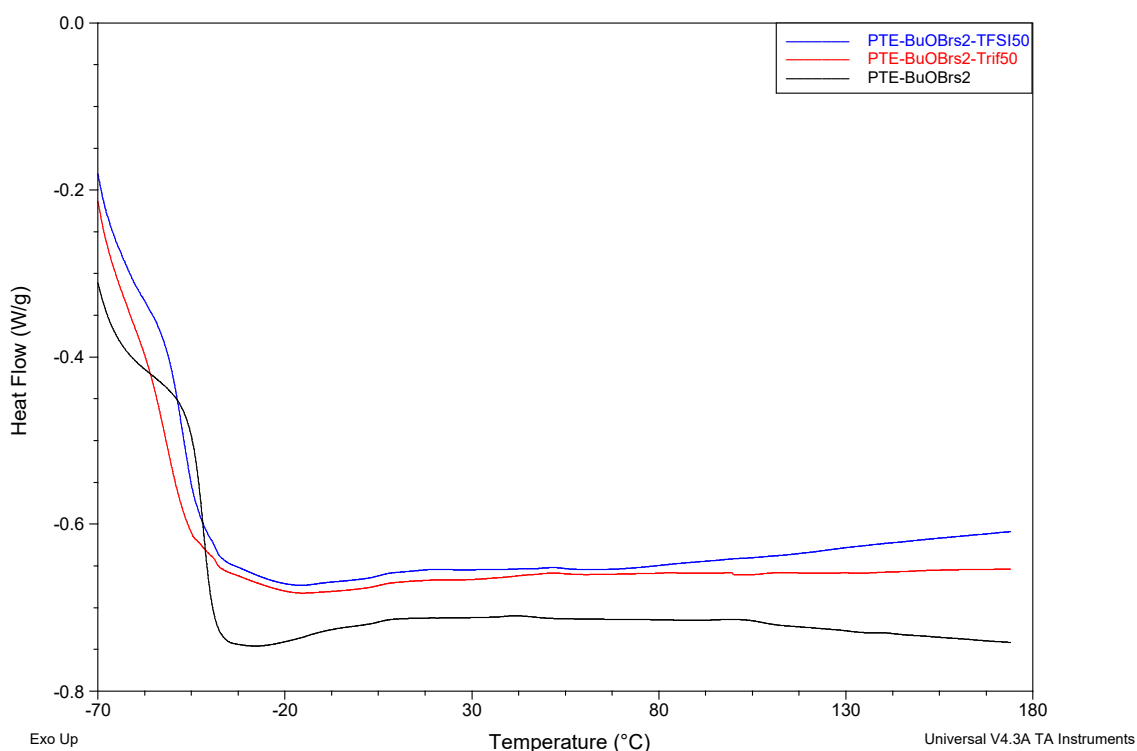

**Figure S8.** DSC curves of thermally cured PTE-BuOBrs-IL dynamic ionogels and PTE-BuOBrs2 sample.
